# Supplementary material
Source: HighWire-hosted journal article supplement (https://erj.ersjournals.com/content/56/5/2003574)
Supplement: inline-supplementary-material-1 [file inline-supplementary-material-1.pdf]

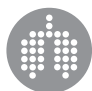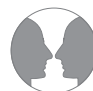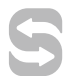

SHAREABLE PDF

# Population-based case-finding to identify airflow obstruction in symptomatic adults at high risk for asthma and COPD

George A. Whitmore<sup>1</sup> and Shawn D. Aaron<sup>2</sup>

**Affiliations:** <sup>1</sup>Desautels Faculty of Management, McGill University, Montreal, QC, Canada. <sup>2</sup>The Ottawa Hospital Research Institute, University of Ottawa, Ottawa, ON, Canada.

**Correspondence:** Shawn D. Aaron, The Ottawa Hospital, General Campus, 501 Smyth Road, Ottawa, Ontario, Canada, K1H 8L6. E-mail: [saaron@ohri.ca](mailto:saaron@ohri.ca)

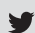

@ERSpublications

**Reply to J.L. Perret and co-workers** <https://bit.ly/3jMx5wX>

**Cite this article as:** Whitmore GA, Aaron SD. Population-based case-finding to identify airflow obstruction in symptomatic adults at high risk for asthma and COPD. *Eur Respir J* 2020; 56: 2003574 [<https://doi.org/10.1183/13993003.03574-2020>].

This single-page version can be shared freely online.

*Reply to J.L. Perret and co-workers:*
